# Supplementary material
Source: PubMed Central journal article supplement (PMC7530527)

## Supplemental Data

### **Lysine acetylation regulates the RNA binding, subcellular localization and inclusion formation of FUS**

Alexandra Arenas<sup>1</sup>, Jing Chen<sup>2</sup>, Lisha Kuang<sup>2</sup>, Kelly R. Barnett<sup>2</sup>, Edward J Kasarskis<sup>3</sup>, Jozsef Gal<sup>2</sup>, Haining Zhu<sup>1,2,3,\*</sup>

<sup>1</sup> Department of Toxicology and Cancer Biology, <sup>2</sup> Department of Molecular and Cellular Biochemistry, <sup>3</sup> Department of Neurology, College of Medicine, University of Kentucky, Lexington, KY 40536, USA; <sup>4</sup> Lexington VA Medical Center, Research and Development, Lexington, KY 40502, USA

\* Correspondence should be addressed to: Dr. Haining Zhu, Department of Molecular and Cellular Biochemistry, University of Kentucky, Lexington, KY 40536. Tel: 1-859-323-3643; Email: [haining@uky.edu](mailto:haining@uky.edu)

**Keywords:** Fused in Sarcoma (FUS), Amyotrophic lateral sclerosis (ALS), Acetylation, Protein-RNA interaction, Protein inclusions

**Supplemental Figure S1. Mass spectrometric identification of K315/K316 acetylation.** The MS/MS spectrum of the di-acetylated peptide <sup>305</sup>FKQIGIIKTNKKTGQPMINLYTDRETGKL<sup>333</sup>. The series of matched b and y ions are shown in blue and red, respectively. The b11, b12, y18 and y19 ions supporting the K315 and K316 acetylation sites are labeled in bold.

**Supplemental Figure S2. FUS acetylation mimicking mutant inclusions co-localize with the stress granule marker G3BP1.** Co-localization of endogenous G3BP1 with EGFP-tagged FUS in N2A cells. The co-localization of FUS and G3BP1 is shown by arrows. Scale bars, 10µm.

**Supplemental figure S3. Characterization of the anti-K510-acetylated FUS antibody.** (A) HEK293T, N2A, and N2A-ΔFUS (FUS knockout) cells were treated with deacetylase inhibitor (DACi) cocktail (30 mM nicotinamide, 50 mM sodium butyrate and 3 µM Trichostatin-A), as indicated. Immunoblotting was performed using the indicated antibodies. (B) N2A ΔFUS cells were transfected with 3×FLAG-tagged WT, K510R, or K510Q FUS or vector control with or without DACi cocktail as indicated. Immunoblotting was performed using the indicated antibodies.

**Supplemental figure S4. Interaction screening of FUS with lysine deacetylases.** HEK293T cells were transfected with 3×FLAG-HDAC 1-11 (A) or 3×FLAG SIRT 1-7 (B). After 48hrs, endogenous FUS immunoprecipitation was performed, followed by immunoblotting using the indicated antibodies. The 3×FLAG-ROA1 (hnRNPA1) construct was used as a positive control.

**Supplemental Figure S1**

**(A)**

**Acetylated peptide  
K315 and 316**

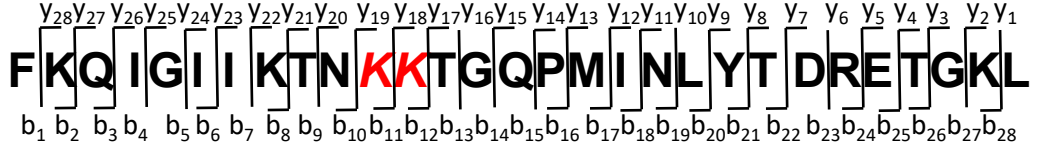

**K = Lys-COCH<sub>3</sub> (+42.01057 Da)**

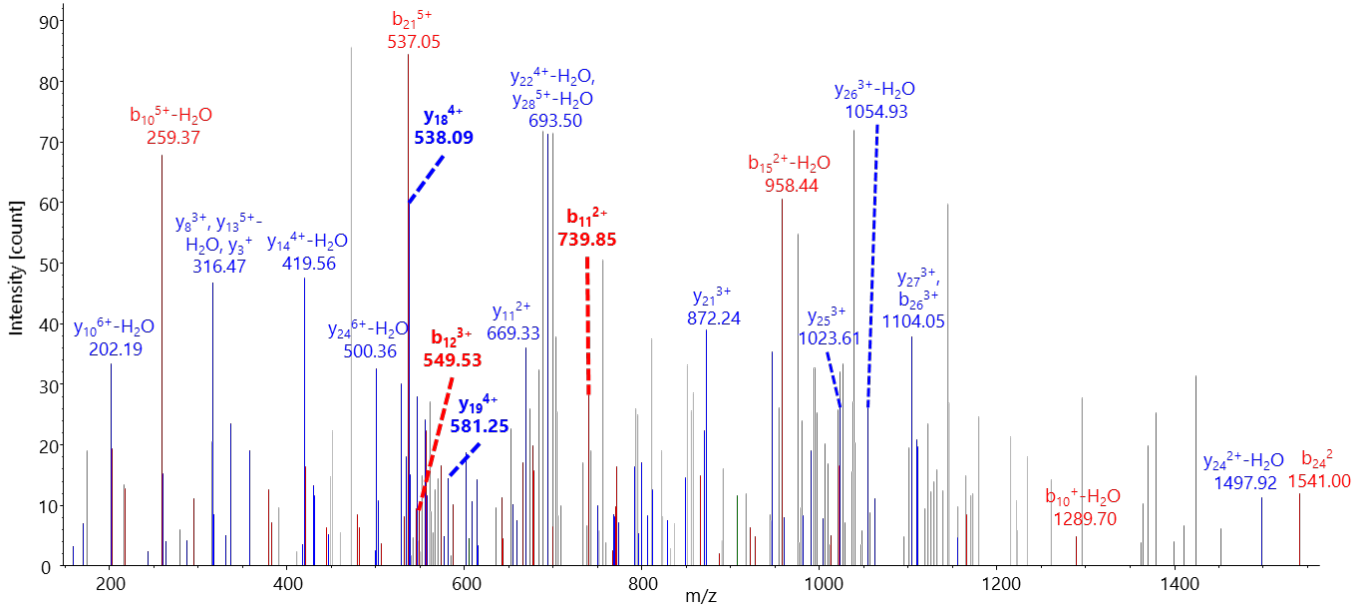

**(B)**

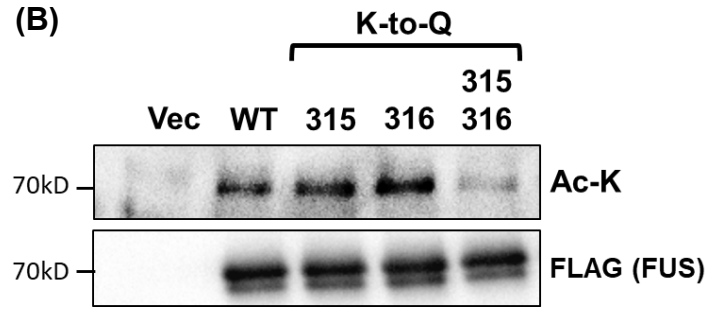

**(C)**

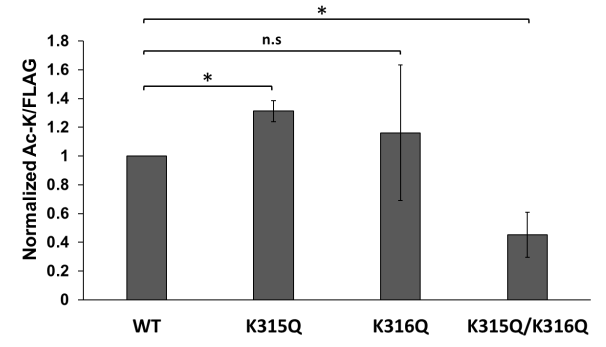

Supplemental Figure S2

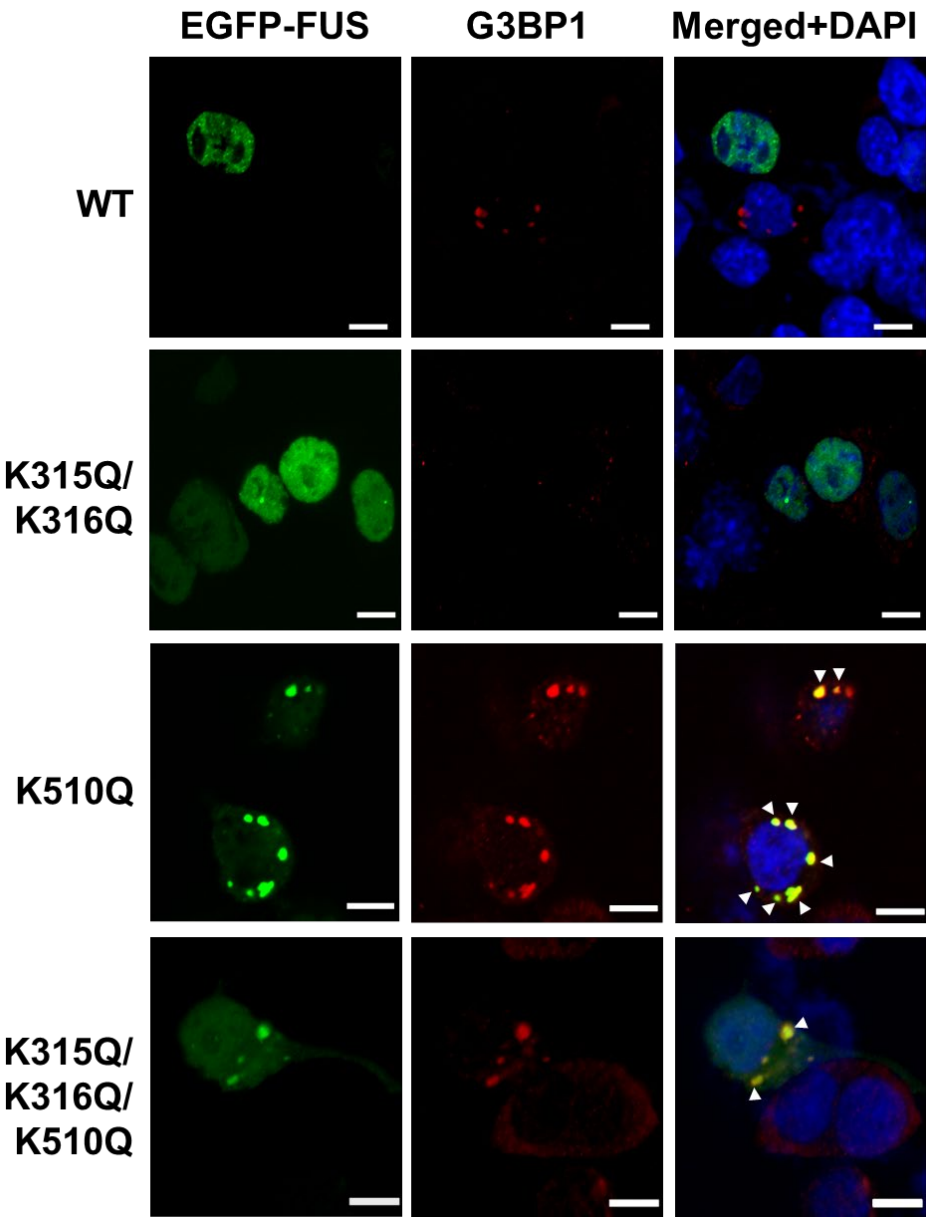

**Supplemental Figure S3: Acetylated FUS-K510 specific antibody characterization**

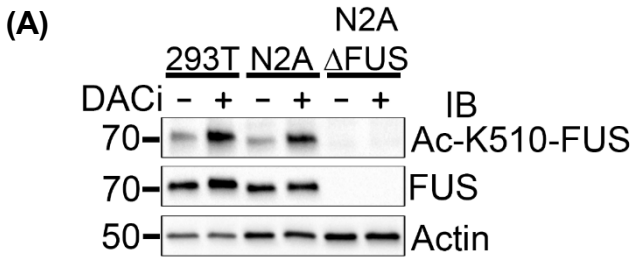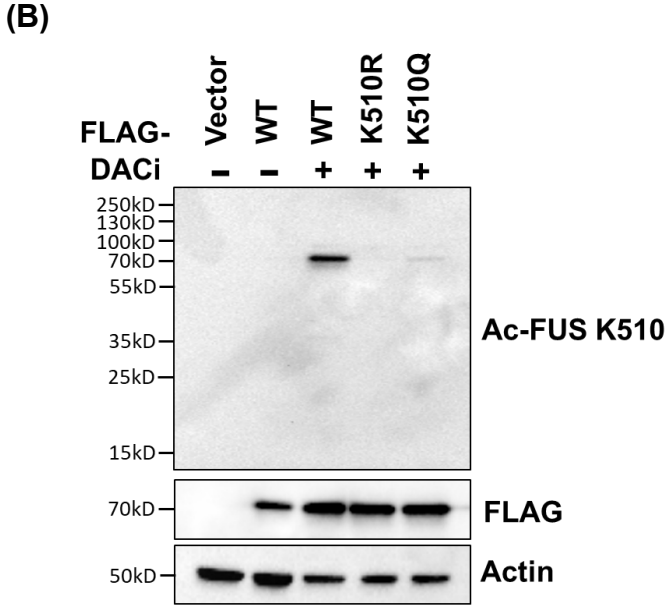

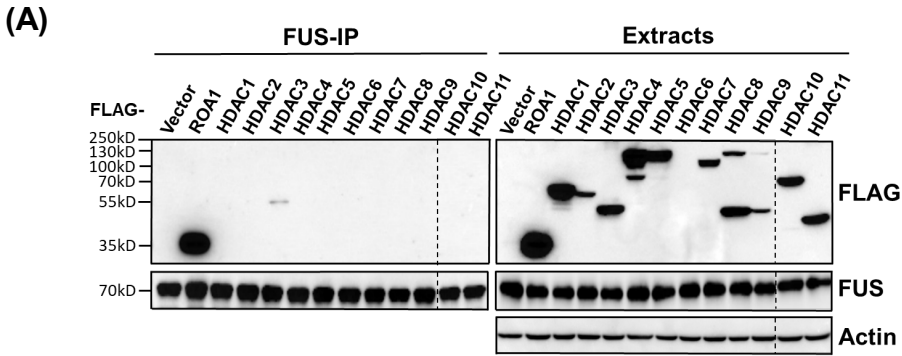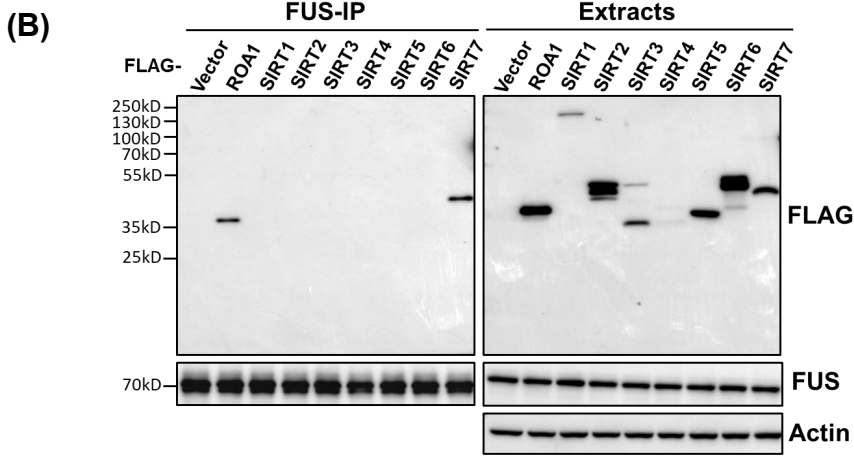

Supplement: fus_acetylation_hmg_supplement_06_16_2020_ddaa159.pdf [file fus_acetylation_hmg_supplement_06_16_2020_ddaa159.pdf]
